# Supplementary material
Source: MDPI journal article supplement (https://www.mdpi.com/2673-4591/4/1/4)

**ICMA  
2021**

# 1st International Conference on Micromachines and Applications

15–30 APRIL 2021 | ONLINE

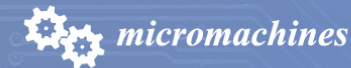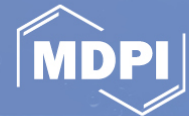

**Yuhei Tanaka <sup>1,\*</sup>, Haruki Watanabe<sup>1</sup>, Kenji Shimoda<sup>1</sup> and Kenji Yasuda<sup>1</sup>**

<sup>1</sup> Department of Pure and Applied Physics, Graduate School of Advanced Science and Engineering, Waseda University, 3-4-1 Okubo, Shinjuku, Tokyo, 169-8555, Japan.

\* Corresponding author: [rmirjaa5613@fuji.waseda.jp](mailto:rmirjaa5613@fuji.waseda.jp)

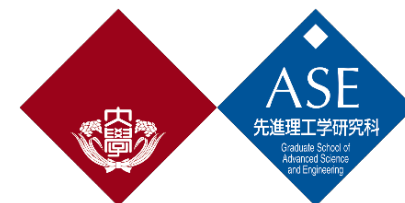

# Flexible microfabrication on a chip during cultivation for a neuronal network direction control using stepwise photo-thermal etching of an agarose architecture

## Pt-coated needle

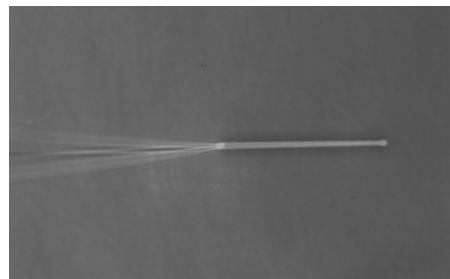

10 μm

## Localized heating

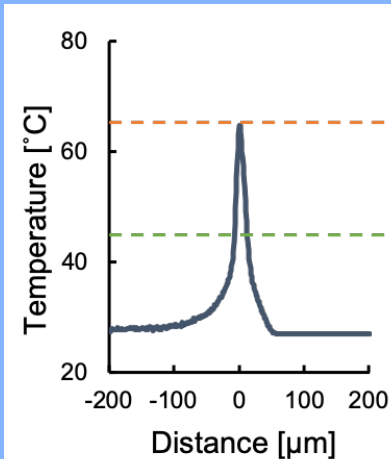

## Processing while culturing

3DIV : Before processing

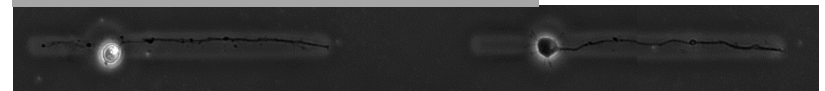

Additional patterning during cultivation

3DIV : 3 hours after processing

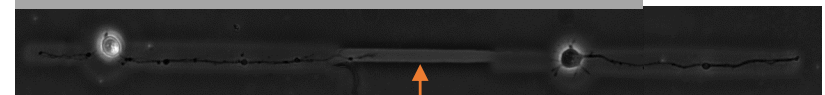

The neurite started to elongate and reached to another neurite

4DIV : Elongation of the neurite

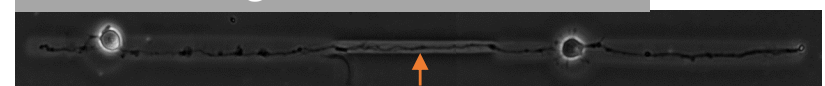

50 μm

## Another technology

3DIV : 3 hours after processing

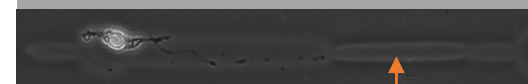

50 μm

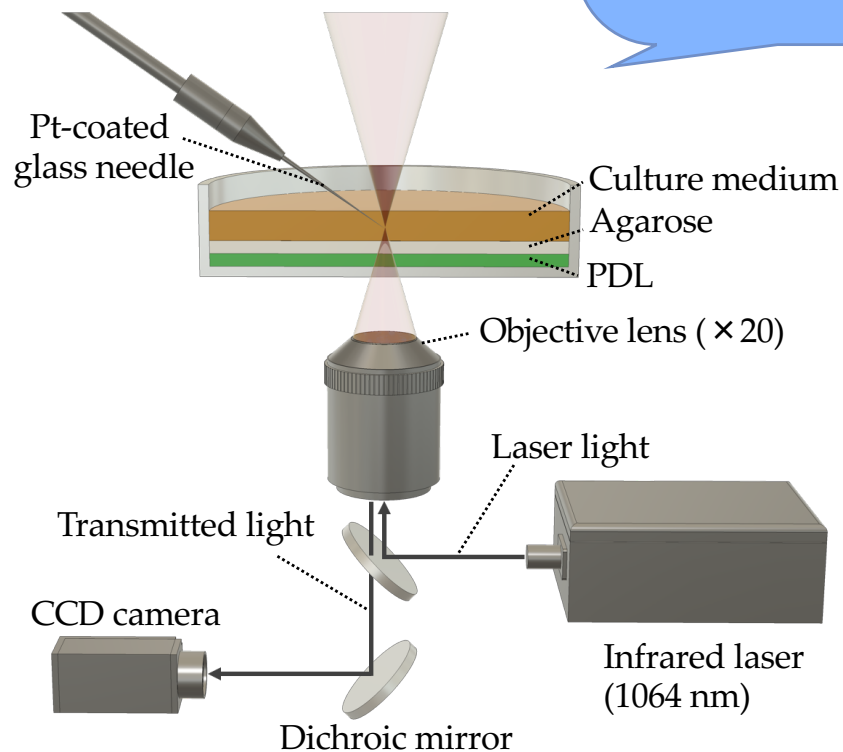

## Abstract

**Abstract:** Control over spatial distributions and patterns of individual neurons and their neurites provides an essential tool for studying the meaning of neuronal network patterns. Moreover, the complete direction control of synaptic connections between cells in each neuronal network is also essential to investigate the detailed information on the relationship between the forward and feedback signaling among the cells. Here, we have developed a method for topographical control of the direction of synaptic connections within a living neuronal network using a new type of individual-cell-based on-chip cell-cultivation system with an agarose microfabrication technology. The advantages of this system include the ability to control positions and number of cultured cells as well as flexible control of the direction of elongation of axons and dendrites with stepwise melting of thin agarose layer coated on the cultivation chip with a focused infrared laser beam even during cultivation without any destructive damage on cells. Using this system, we succeeded in forming fully-direction controlled single-cell-based neuronal network from individual Rat hippocampal cells. In this meeting, we discuss the potential damage of heat to cells while stepwise melting of agarose and demonstrate the ability of our on-chip agarose microfabrication method for individual cell-based neural networks.

**Keywords:** Neuronal network; agarose microfabrication technology; non-destructive stepwise photo-thermal etching; neurite direction control.

## Introduction

# How to create the fully direction controlled neuronal network on a chip?

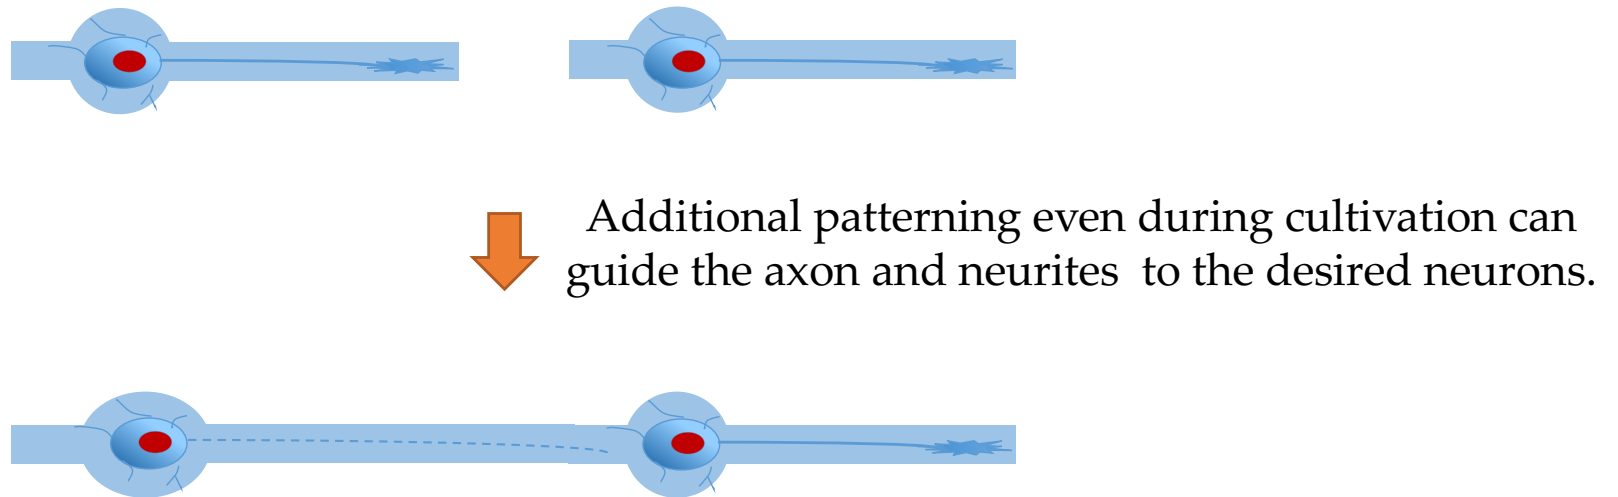

**Fig.1.** A method to guide each neurite with additional patterning.

## Results and Discussions

**An agarose microfabrication technology: Melting a portion of agarose with a focused infrared laser absorbance.**

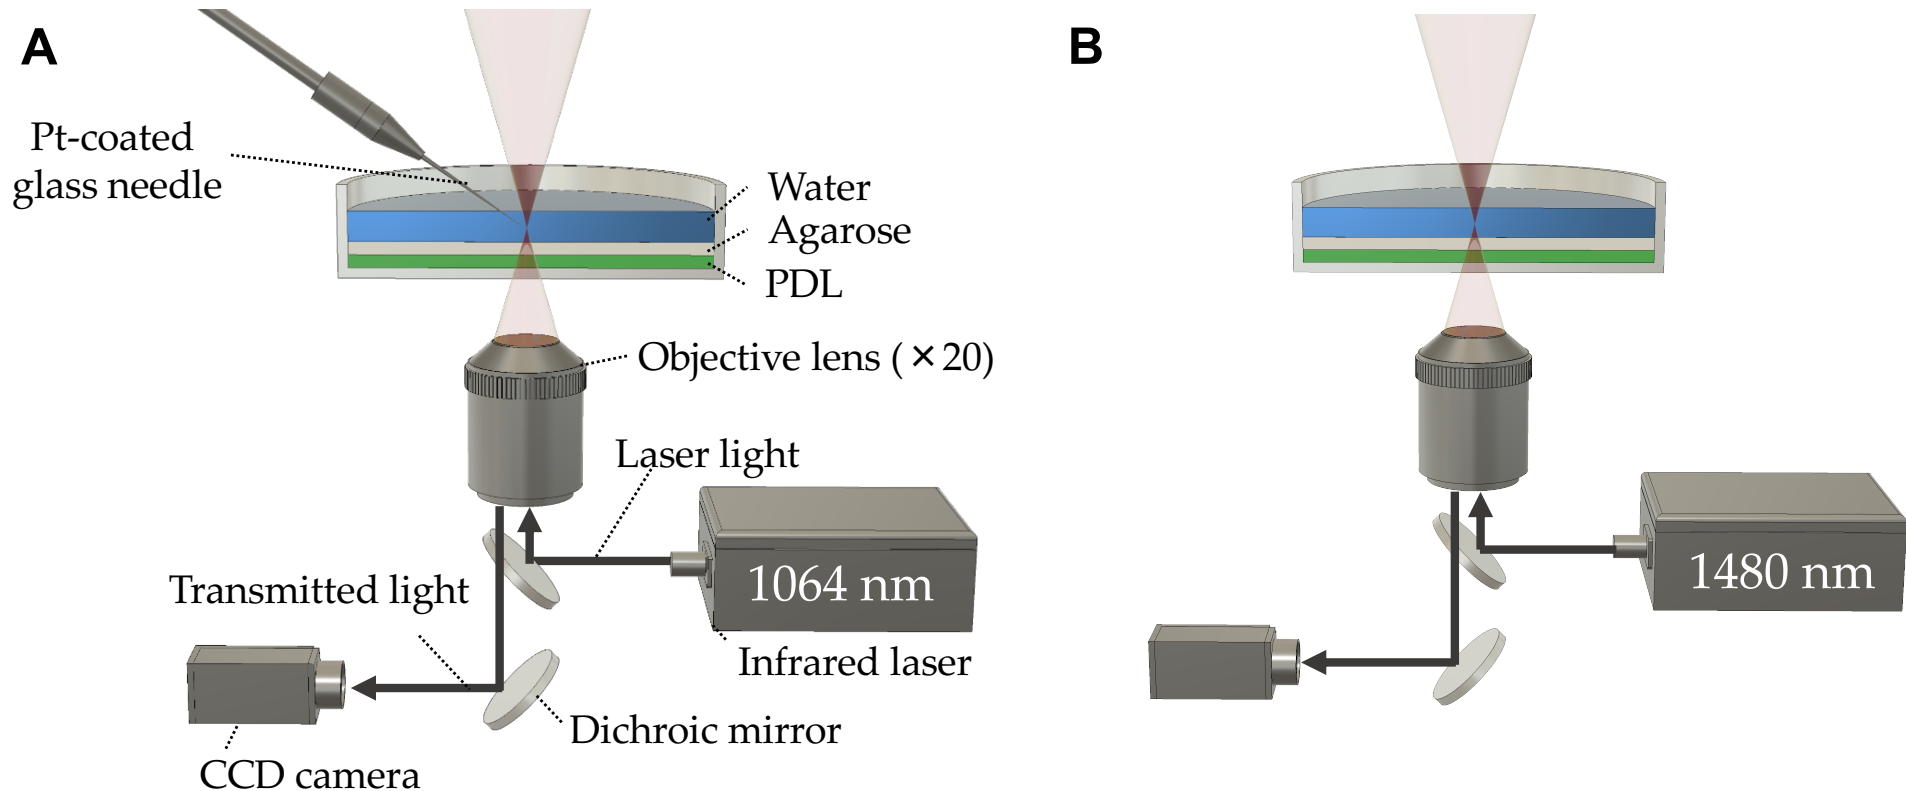

**Fig.2.** Two ways of system design: (A) Microneedle absorbance technology, (B) direct absorbance technology.

## Results and Discussions

**Microneedle absorbance technology: Melting a one-micrometer portion of agarose layer with a heat of 0.7 micrometer microneedle tip by absorbance of 1064-nm IR laser.**

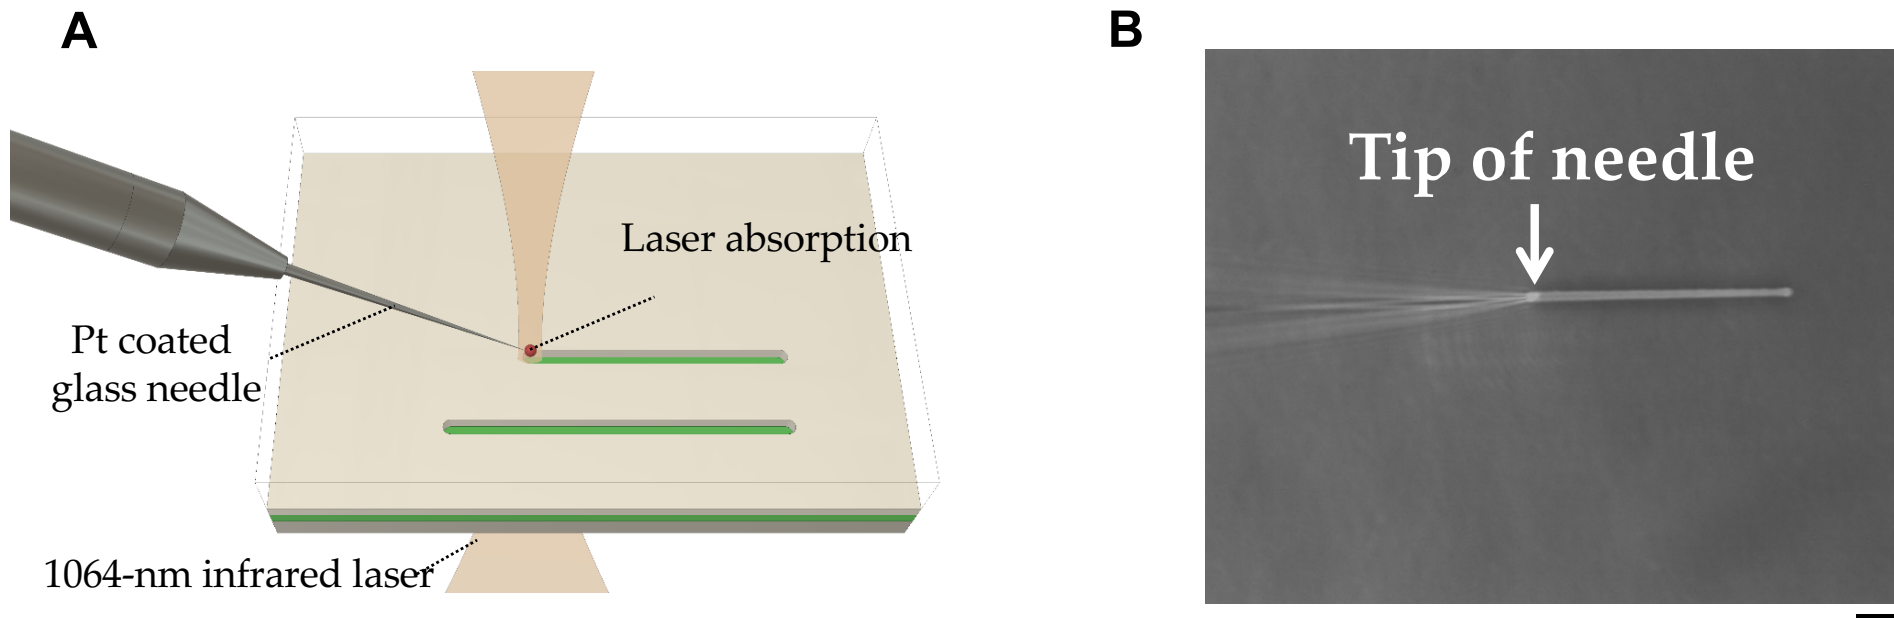

**Fig.3.** Detailed drawings of agarose microfabrication with Pt-coated microneedle (A) Schematic figure. (B) Phase contrast image of agarose microfabrication. Bar, 10  $\mu\text{m}$ .

## Results and Discussions

### Precise control of agarose microfabrication with micrometer resolution.

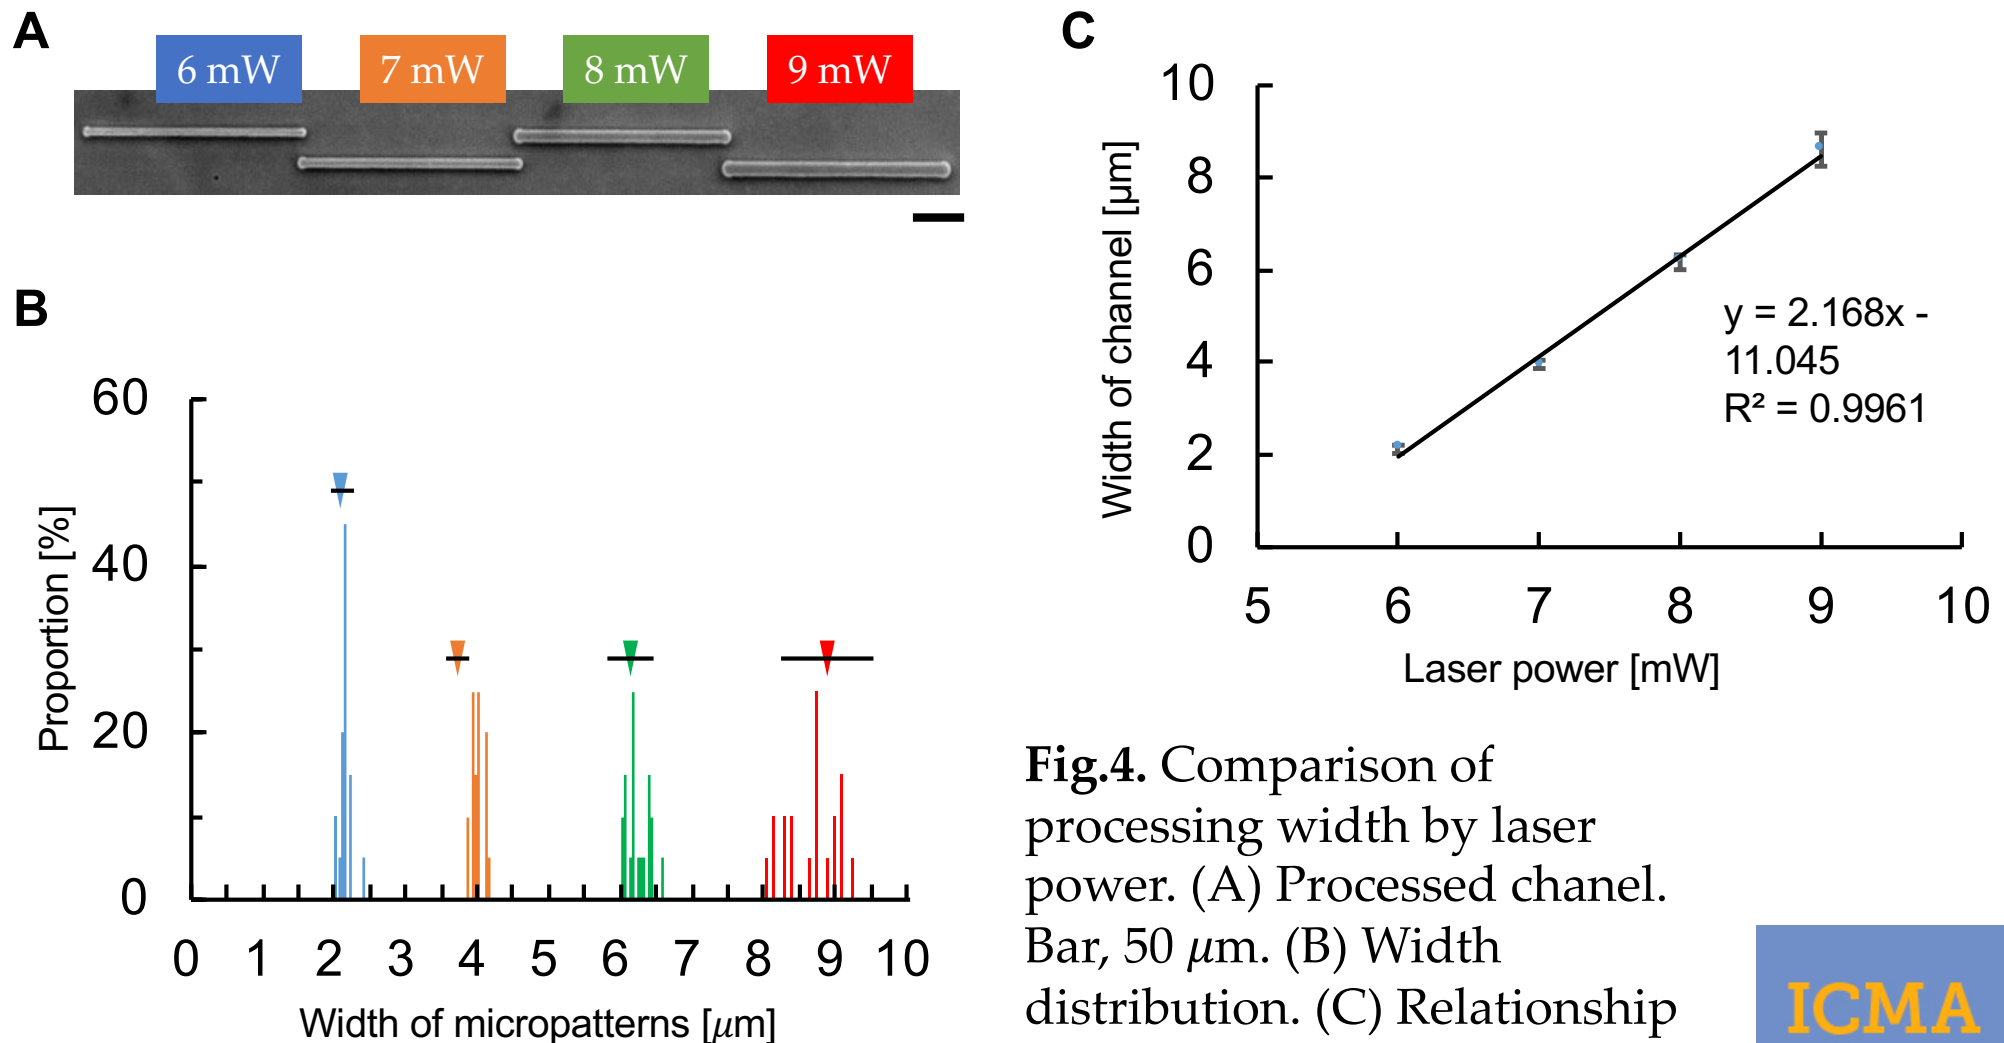

**Fig.4.** Comparison of processing width by laser power. (A) Processed channel. Bar, 50  $\mu\text{m}$ . (B) Width distribution. (C) Relationship between laser power and width.

## Results and Discussions

Single neurite was elongated in the two-micrometer- width agarose microchannel.

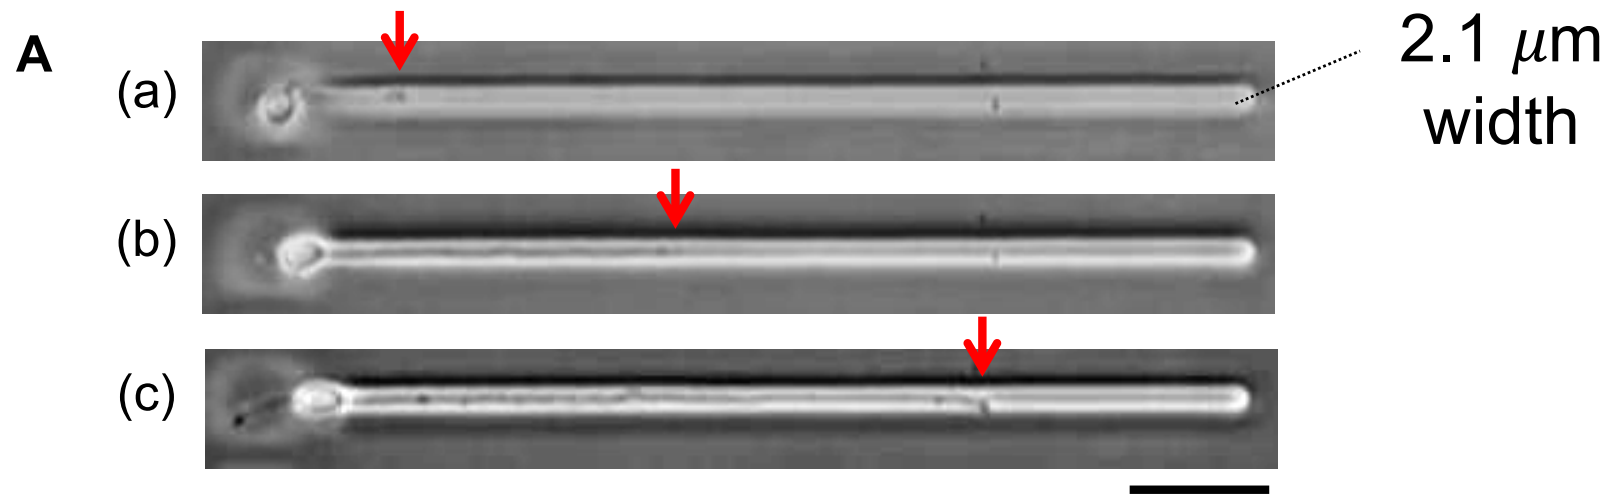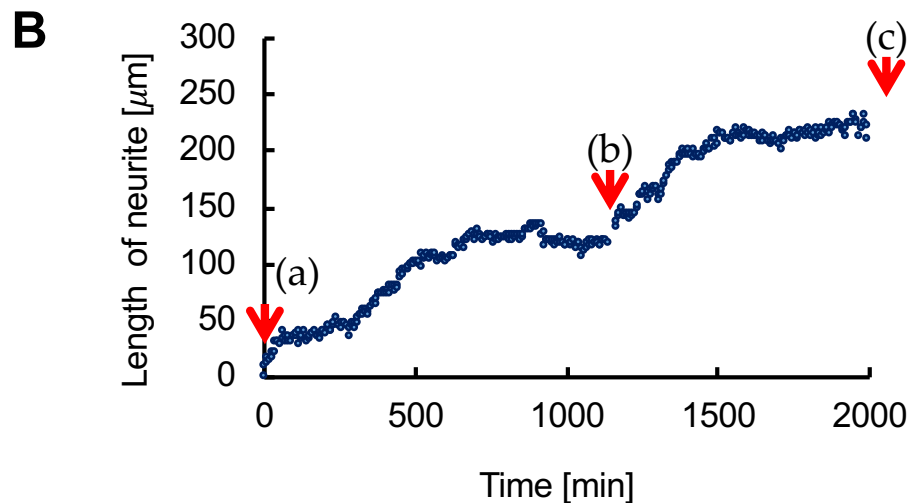

**Fig.5.** Observation of neurite elongation. (A) Elongation of the two neurites. Bar, 50  $\mu\text{m}$ . (B) Time course of neurite length.

## Results and Discussions

**Heat distribution of our two agarose microfabrication technologies: Microneedle and direct absorbance methods.**

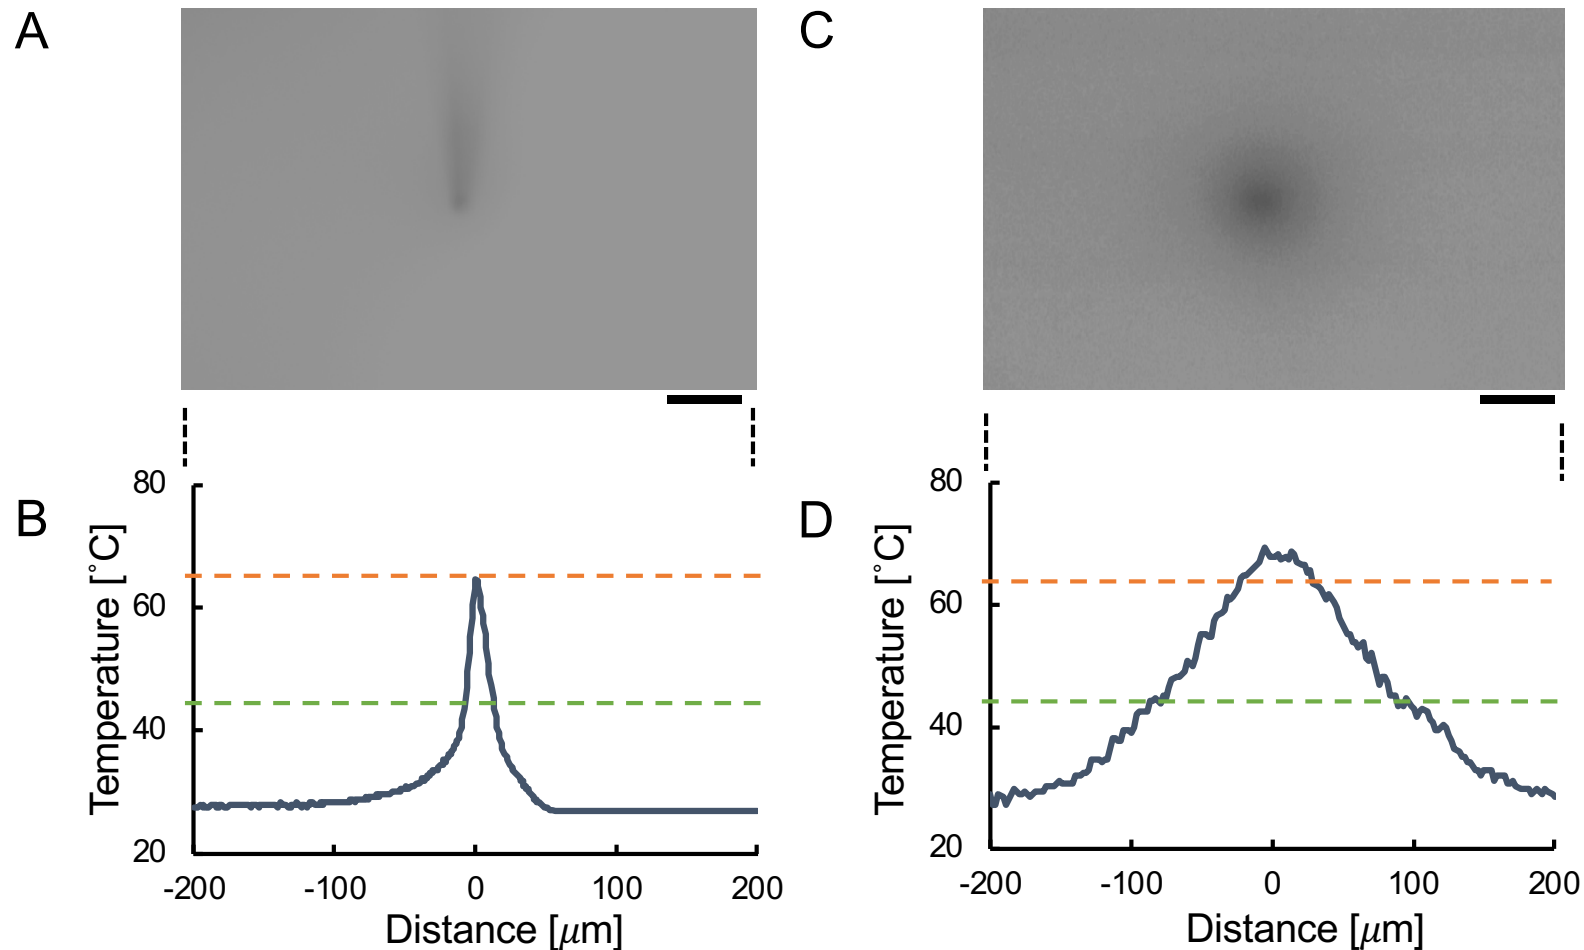

**Fig.6.** Comparison of the heating ranges of agarose microfabrication technologies. (A)(B) Microneedle method. (C)(D) Direct absorbance method. Bars, 50 μm.

## Results and Discussions

### Stepwise additional agarose microfabrication guided an axon to another neuron.

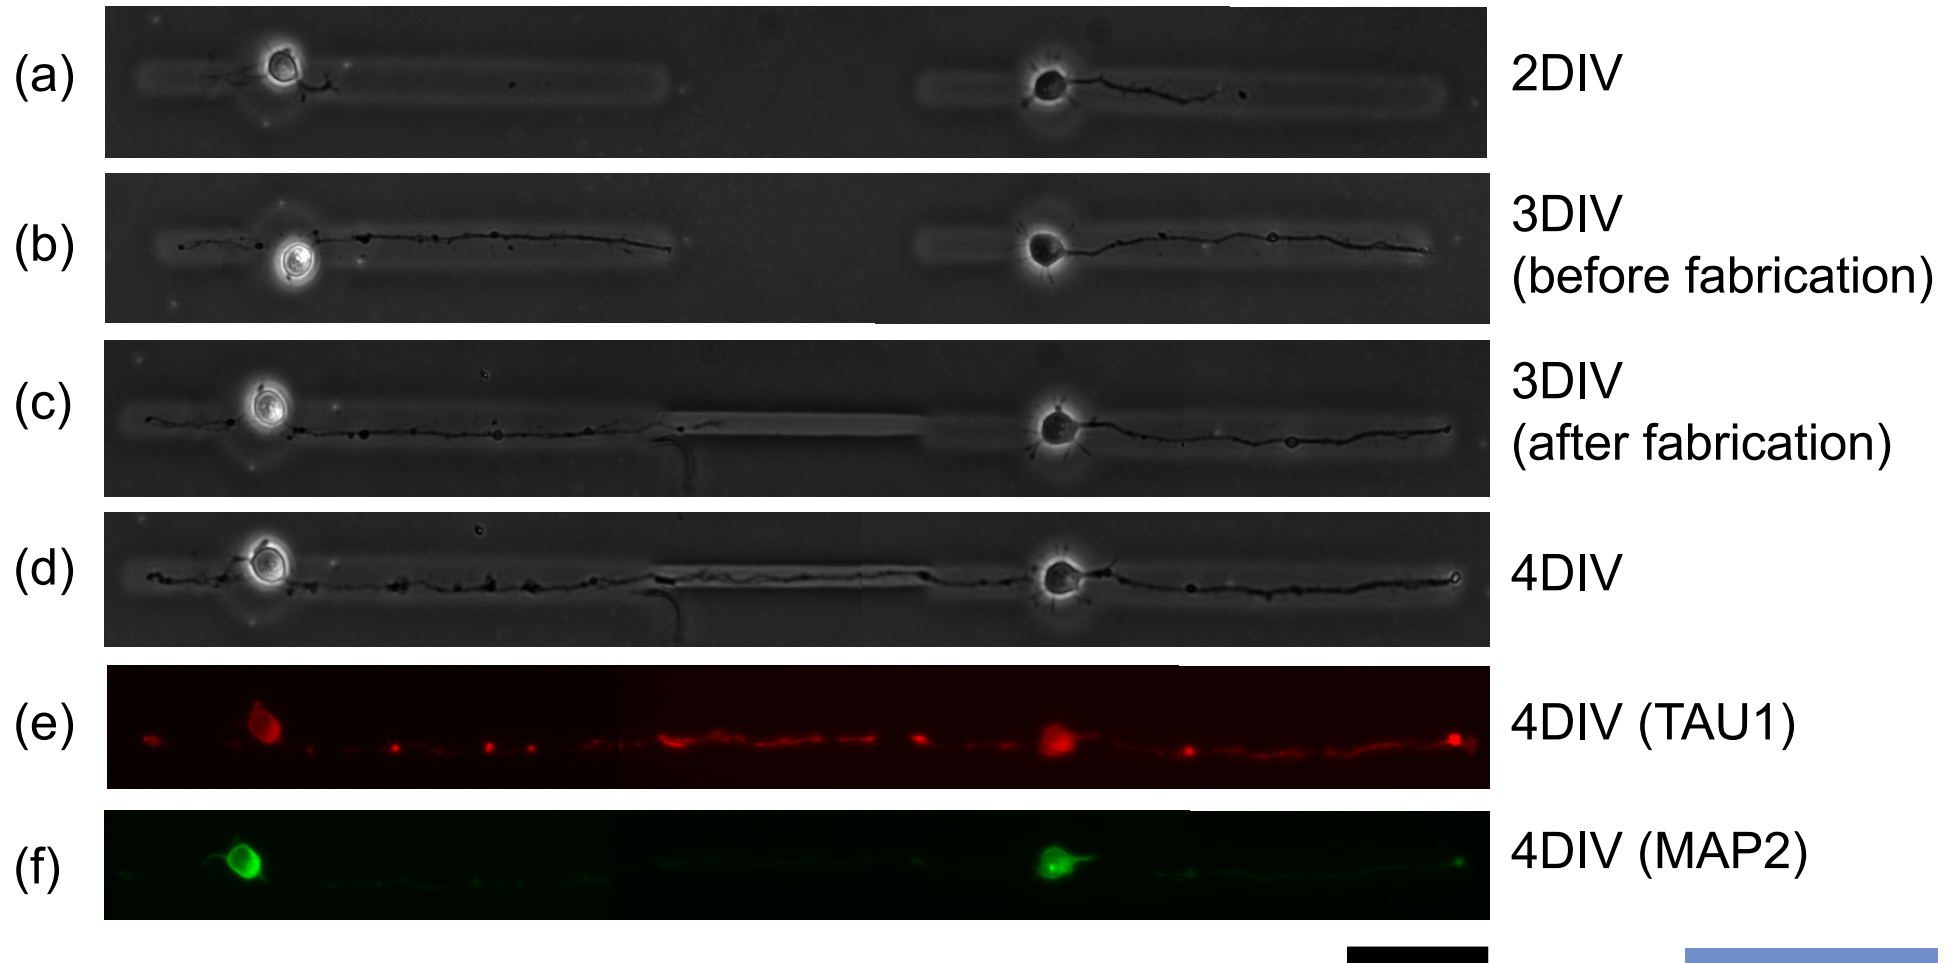

**Fig.7.** Additional processing during cell culture and subsequent staining.  
Bar, 50  $\mu\text{m}$ .

## Conclusions

- 1) We have developed two novel agarose microfabrication methods with infrared laser absorbance.**
- 2) We have succeeded in fabricating 2  $\mu\text{m}$  width microchannels even during cultivation and confirmed the neurites elongated in those agarose microchannels.**
- 3) We have succeeded in guiding an axon to the desired neuron to form a direction controlled neuronal network without any damage while additional microfabrication.**

# Acknowledgements

We thank to Dr. Akihiro Hattori, Mr. Masao Odaka and all the members of Yasuda lab for their technical supports, discussion, and suggestions. This research was funded by research and development projects of the Industrial Science and Technology Program, the New Energy and Industrial Technology Development Organization (NEDO, P08030), JSPS KAKENHI Grant Number JP17H02757, JST CREST program (1J138), and Waseda University Grant for Special Research Projects (2016S-093, 2017B-205, 2017K-239, 2018K-265, 2018B-186, 2019C-559, 2020C-276), the Leading Graduate Program in Science and Engineering for Waseda University from MEXT, Japan.

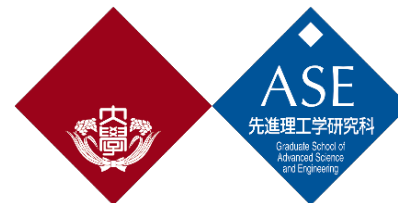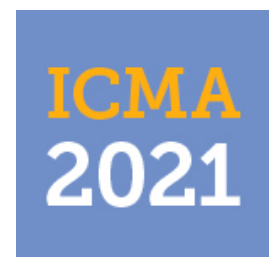

Supplement: s1 [file s1]
